# Supplementary material
Source: PubMed Central journal article supplement (PMC2758161)
Supplement: NIHMS115994-supplement-01.pdf [file NIHMS115994-supplement-01.pdf]

**Supplemental Table A: Descriptive Data for Edentulism by Socio-economic and Racial/Ethnic Characteristics**

| <b>Demographic Characteristic</b>    | <b>Total</b> | <b>Whites</b> | <b>Blacks</b> | <b>Mexican Americans</b> |
|--------------------------------------|--------------|---------------|---------------|--------------------------|
| <b>% (n)</b>                         | 12% (1,957)  | 18% (1,222)   | 10% (458)     | 5% (213)                 |
| <b>Mean Age (s.d.)</b>               | 70 yrs (13)  | 72 yrs (13)   | 67 yrs (13)   | 70 yrs (11)              |
| <b>Female</b>                        | 12%          | 17%           | 10%           | 5%                       |
| <b>Education</b>                     |              |               |               |                          |
| ≤ 8 years                            | 23%          | 50%           | 28%           | 8%                       |
| 9-12 years                           | 10%          | 18%           | 7%            | 2%                       |
| ≥12 years                            | 5%           | 6%            | 4%            | 1%*                      |
| <b>Poverty Income Ratio</b>          |              |               |               |                          |
| >4 (Lowest poverty)                  | 5%           | 7%            | 4%            | 1%                       |
| 3-4                                  | 8%           | 11%           | 5%            | 2%                       |
| 2-3                                  | 12%          | 18%           | 8%            | 4%                       |
| 1-2                                  | 15%          | 29%           | 11%           | 5%                       |
| ≤ 1 (Highest poverty)                | 12%          | 30%           | 12%           | 5%*                      |
| <b>Occupation<sup>†</sup></b>        |              |               |               |                          |
| White Collar                         | 3%           | 5%            | 2%            | 1%                       |
| Service Groups                       | 6%           | 12%           | 7%            | 1%                       |
| Farm Workers                         | 6%           | 13%           | 12%           | 1%                       |
| Blue Collar                          | 5%           | 11%           | 4%            | 1%                       |
| <b>Dental Insurance</b>              | 16%          | 21%           | 12%           | 5%                       |
| <b>Medical Insurance<sup>†</sup></b> | 10%          | 16%           | 9%            | 5%                       |
| <b>Dental Care Utilization</b>       |              |               |               |                          |
| Once a year                          | 2%           | 1%            | 3%            | 1%                       |
| At least once every 2 yrs            | 6%           | 10%           | 2%            | 3%                       |
| When needed                          | 17%          | 32%           | 13%           | 6%                       |
| Don't go                             | 55%          | 74%           | 42%           | 21%                      |
| <b>Region</b>                        |              |               |               |                          |
| West                                 | 7%           | 10%           | 8%            | 5%                       |
| Midwest                              | 14%          | 20%           | 9%            | 1%                       |
| South                                | 12%          | 19%           | 10%           | 5%                       |
| Northeast                            | 15%          | 19%           | 10%           | 6%                       |
| <b>Foreign-born<sup>§</sup></b>      | 4%           | -*            | -*            | 4%                       |

\*Limited data for this stratum

† Estimates may be unstable due to insufficient numbers of individuals within strata.

§Other=Born in Mexico for Mexican Americans
